# Supplementary material for: Extending the clinical and mutational spectrum of TRIM32-related myopathies in a non-Hutterite population
Source: PubMed Central journal article supplement — J Neurol Neurosurg Psychiatry. 2018 Jun 19;90(4):490–3. doi: 10.1136/jnnp-2018-318288 (PMC6581110; doi:10.1136/jnnp-2018-318288), 2018-06-19
Supplement: jnnp-2018-318288supp002.pdf [file jnnp-2018-318288supp002.pdf]

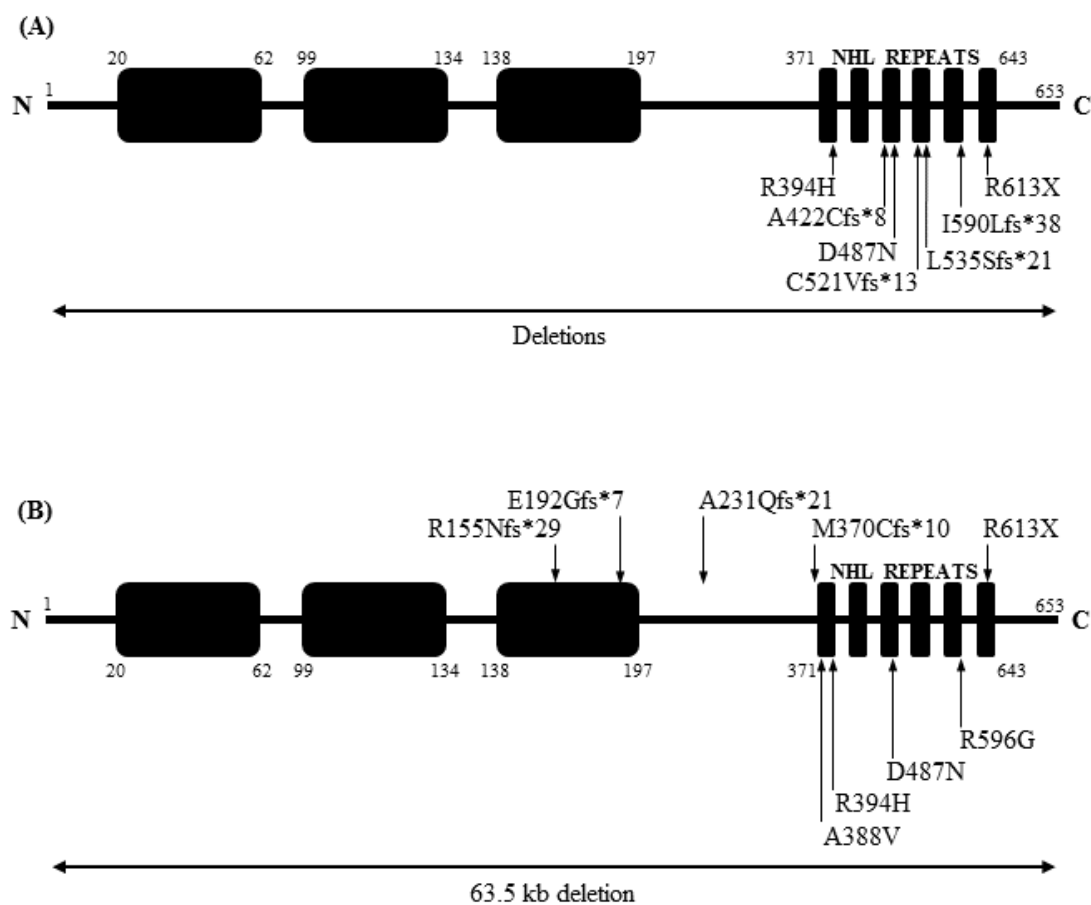

**Supplementary figure 1. Location of *TRIM32*-related myopathy mutations.** (A) *TRIM32* encodes a 653 amino acid protein, which comprises a RING, B-box and coiled-coil domain in addition to six NHL repeats at the C-terminal. Mutations associated with *TRIM32*-related myopathy, including the Hutterite LGMD2H founder mutation p.Asp487Asn (D487N), reside in the NHL repeat region. Smaller case numbers above the linear protein represent the amino acid residues. Larger deletions of *TRIM32* and frameshift mutations have also been reported. (B) Position of the *TRIM32* variants identified for the nine *TRIM32*-related myopathy patients in this study. All detected variants reside in the coiled-coil, intervening and NHL repeat domains.
